# Supplementary material
Source: PubMed Central journal article supplement (PMC3943516)

## **Legends to Supplemental Tables**

**Supplemental Table 1. Human-mouse ECRs identified in the comparative genomic analysis of the *SIMI* locus.**

**Supplemental Table 2. The 17 ECRs selected for zebrafish enhancer assays.**

**Supplemental Table 3. Results for SCE zebrafish enhancer assays during developmental time points.**

**Supplemental Table 4. Results for SCE zebrafish enhancer assays during month time points.**

**Supplemental Table 5. SCE2 deletion series primers.**

**Supplemental Table 6. SCE2 deletion series and obesity-associated variants zebrafish enhancer results.**

**Supplemental Table 7. SCE2 1000 Genomes sequencing analysis.**

**Supplemental Figure 1. SCE2 LacZ enhancer assay across developmental time points: E12.5-E15.5.**

**Supplemental Figure 2. SCE8 enhancer assay (E12.5).** Three out of six mice exhibited consistent midbrain enhancer activity as reflected by LacZ staining.

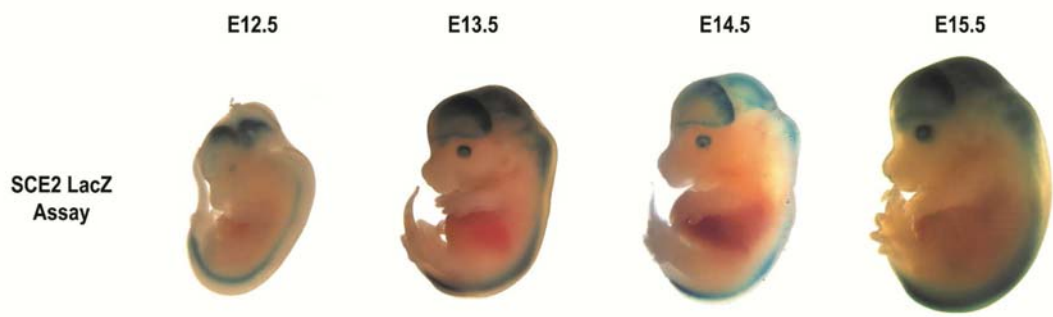

SCE8

---

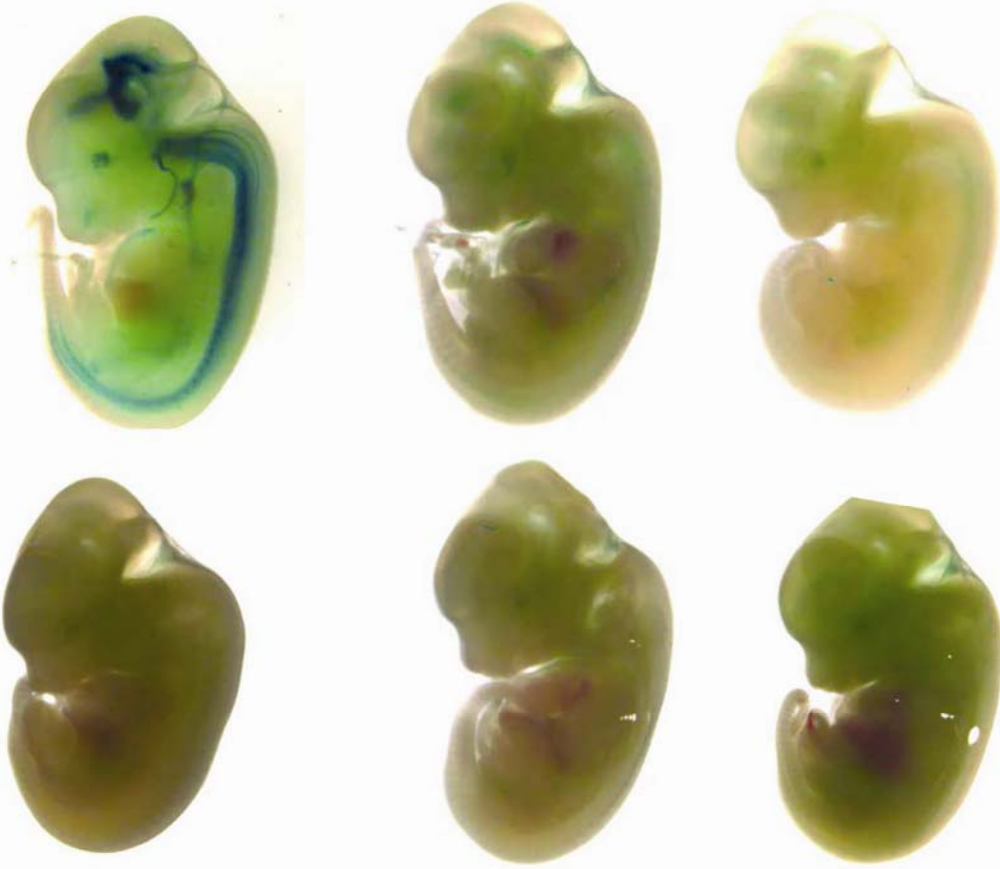

Supplement: supp_ddt559_ddt559supp.pdf [file supp_ddt559_ddt559supp.pdf]
